# Supplementary material
Source: PubMed Central journal article supplement (PMC5854813)
Supplement: npp2017290x5.pdf [file npp2017290x5.pdf]

| Region                                    | Source                                    | Wald chi-square | df     | p     | pFDR   |       |
|-------------------------------------------|-------------------------------------------|-----------------|--------|-------|--------|-------|
| Amy                                       | Diagnosis                                 | 0.006           | 1      | 0.94  | 0.98   |       |
|                                           | Site                                      | 26.534          | 1      | <0.01 | <0.01  |       |
|                                           | Sex                                       | 6.256           | 1      | 0.01  | 0.03   |       |
|                                           | rs1360780                                 | 1.271           | 1      | 0.26  | 0.56   |       |
|                                           | Age                                       | 8.008           | 1      | 0.01  | 0.03   |       |
|                                           | TIV                                       | 77.695          | 1      | <0.01 | <0.01  |       |
|                                           | Side                                      | 72.352          | 1      | <0.01 | <0.01  |       |
|                                           | FKBP5 methylation                         | 0.353           | 1      | 0.55  | 0.74   |       |
|                                           | Diagnosis * rs1360780                     | 0.616           | 1      | 0.43  | 0.71   |       |
|                                           | Diagnosis * FKBP5 methylation             | 0.002           | 1      | 0.96  | 0.98   |       |
|                                           | rs1360780 * FKBP5 methylation             | 1.226           | 1      | 0.27  | 0.58   |       |
|                                           | Diagnosis * rs1360780 * FKBP5 methylation | 0.661           | 1      | 0.42  | 0.71   |       |
|                                           | ACC                                       | Diagnosis       | 0.785  | 1     | 0.38   | 0.71  |
|                                           |                                           | Site            | 14.702 | 1     | <0.01  | <0.01 |
|                                           |                                           | Sex             | 0.391  | 1     | 0.53   | 0.74  |
| rs1360780                                 |                                           | 0.034           | 1      | 0.85  | 0.93   |       |
| Age                                       |                                           | 46.922          | 1      | <0.01 | <0.01  |       |
| TIV                                       |                                           | 160.154         | 1      | <0.01 | <0.01  |       |
| Side                                      |                                           | 3.124           | 1      | 0.08  | 0.22   |       |
| FKBP5 methylation                         |                                           | 0.027           | 1      | 0.87  | 0.94   |       |
| Diagnosis * rs1360780                     |                                           | 2.848           | 1      | 0.09  | 0.24   |       |
| Diagnosis * FKBP5 methylation             |                                           | 0.626           | 1      | 0.43  | 0.71   |       |
| rs1360780 * FKBP5 methylation             |                                           | 0.037           | 1      | 0.85  | 0.93   |       |
| Diagnosis * rs1360780 * FKBP5 methylation |                                           | 2.762           | 1      | 0.10  | 0.26   |       |
| Hip                                       |                                           | Diagnosis       | 0.178  | 1     | 0.67   | 0.79  |
|                                           |                                           | Site            | 14.839 | 1     | <0.01  | <0.01 |
|                                           |                                           | Sex             | 0.06   | 1     | 0.81   | 0.91  |
|                                           | rs1360780                                 | 1.617           | 1      | 0.20  | 0.47   |       |
|                                           | Age                                       | 1.433           | 1      | 0.23  | 0.52   |       |
|                                           | TIV                                       | 126.782         | 1      | <0.01 | <0.01  |       |
|                                           | Side                                      | 38.666          | 1      | <0.01 | <0.01  |       |
|                                           | FKBP5 methylation                         | 0.969           | 1      | 0.33  | 0.64   |       |
|                                           | Diagnosis * rs1360780                     | 0.648           | 1      | 0.42  | 0.71   |       |
|                                           | Diagnosis * FKBP5 methylation             | 0.127           | 1      | 0.72  | 0.84   |       |
|                                           | rs1360780 * FKBP5 methylation             | 1.823           | 1      | 0.18  | 0.43   |       |
|                                           | Diagnosis * rs1360780 * FKBP5 methylation | 0.66            | 1      | 0.42  | 0.71   |       |
|                                           | IFG                                       | Diagnosis       | 1.518  | 1     | 0.22   | 0.50  |
|                                           |                                           | Site            | 11.411 | 1     | <0.01  | <0.01 |
|                                           |                                           | Sex             | 7.919  | 1     | 0.01   | 0.03  |
| rs1360780                                 |                                           | 0.29            | 1      | 0.59  | 0.76   |       |
| Age                                       |                                           | 56.989          | 1      | <0.01 | <0.01  |       |
| TIV                                       |                                           | 130.906         | 1      | <0.01 | <0.01  |       |
| Side                                      |                                           | 10.016          | 1      | <0.01 | <0.01  |       |
| FKBP5 methylation                         |                                           | 1.404           | 1      | 0.24  | 0.53   |       |
| Diagnosis * rs1360780                     |                                           | 0.564           | 1      | 0.45  | 0.71   |       |
| Diagnosis * FKBP5 methylation             |                                           | 1.406           | 1      | 0.24  | 0.53   |       |
| rs1360780 * FKBP5 methylation             |                                           | 0.228           | 1      | 0.63  | 0.77   |       |
| Diagnosis * rs1360780 * FKBP5 methylation |                                           | 0.763           | 1      | 0.38  | 0.71   |       |
| IFO                                       |                                           | Diagnosis       | 0.564  | 1     | 0.45   | 0.71  |
|                                           |                                           | Site            | 9.59   | 1     | <0.01  | <0.01 |
|                                           |                                           | Sex             | 0.016  | 1     | 0.90   | 0.96  |
|                                           | rs1360780                                 | 0.202           | 1      | 0.65  | 0.78   |       |
|                                           | Age                                       | 77.7            | 1      | <0.01 | <0.01  |       |
|                                           | TIV                                       | 96.75           | 1      | <0.01 | <0.01  |       |
|                                           | Side                                      | 86.914          | 1      | <0.01 | <0.01  |       |
|                                           | FKBP5 methylation                         | 3.693           | 1      | 0.06  | 0.17   |       |
|                                           | Diagnosis * rs1360780                     | 0.004           | 1      | 0.95  | 0.98   |       |
|                                           | Diagnosis * FKBP5 methylation             | 0.71            | 1      | 0.40  | 0.71   |       |
|                                           | rs1360780 * FKBP5 methylation             | 0.277           | 1      | 0.60  | 0.76   |       |
|                                           | Diagnosis * rs1360780 * FKBP5 methylation | 0.002           | 1      | 0.97  | 0.98   |       |
|                                           | IFGO                                      | Diagnosis       | 0.243  | 1     | 0.62   | 0.77  |
|                                           |                                           | Site            | 13.91  | 1     | <0.01  | <0.01 |
|                                           |                                           | Sex             | 1.91   | 1     | 0.17   | 0.41  |
| rs1360780                                 |                                           | 0.506           | 1      | 0.48  | 0.71   |       |
| Age                                       |                                           | 88.283          | 1      | <0.01 | <0.01  |       |
| TIV                                       |                                           | 95.261          | 1      | <0.01 | <0.01  |       |
| Side                                      |                                           | 117.716         | 1      | <0.01 | <0.01  |       |
| FKBP5 methylation                         |                                           | 11.934          | 1      | <0.01 | <0.01* |       |
| Diagnosis * rs1360780                     |                                           | 0.278           | 1      | 0.60  | 0.76   |       |
| Diagnosis * FKBP5 methylation             |                                           | 0.363           | 1      | 0.55  | 0.74   |       |
| rs1360780 * FKBP5 methylation             |                                           | 0.585           | 1      | 0.45  | 0.71   |       |
| Diagnosis * rs1360780 * FKBP5 methylation |                                           | 0.232           | 1      | 0.63  | 0.77   |       |
| Ins                                       |                                           | Diagnosis       | 0.53   | 1     | 0.47   | 0.71  |
|                                           |                                           | Site            | 13.198 | 1     | <0.01  | <0.01 |
|                                           |                                           | Sex             | 0.182  | 1     | 0.67   | 0.79  |
|                                           | rs1360780                                 | 0.012           | 1      | 0.91  | 0.97   |       |
|                                           | Age                                       | 26.975          | 1      | <0.01 | <0.01  |       |
|                                           | TIV                                       | 109.366         | 1      | <0.01 | <0.01  |       |

|      |                                           |         |   |       |       |
|------|-------------------------------------------|---------|---|-------|-------|
|      | Side                                      | 4.12    | 1 | 0.04  | 0.12  |
|      | FKBP5 methylation                         | 2.673   | 1 | 0.10  | 0.26  |
|      | Diagnosis * rs1360780                     | 0.521   | 1 | 0.47  | 0.71  |
|      | Diagnosis * FKBP5 methylation             | 0.531   | 1 | 0.47  | 0.71  |
|      | rs1360780 * FKBP5 methylation             | 0.019   | 1 | 0.89  | 0.96  |
|      | Diagnosis * rs1360780 * FKBP5 methylation | 0.565   | 1 | 0.45  | 0.71  |
| MFO  | Diagnosis                                 | 4.47    | 1 | 0.04  | 0.12  |
|      | Site                                      | 13.269  | 1 | <0.01 | <0.01 |
|      | Sex                                       | 0.109   | 1 | 0.74  | 0.86  |
|      | rs1360780                                 | 0.575   | 1 | 0.45  | 0.71  |
|      | Age                                       | 46.194  | 1 | <0.01 | <0.01 |
|      | TIV                                       | 103.964 | 1 | <0.01 | <0.01 |
|      | Side                                      | 0.001   | 1 | 0.98  | 0.99  |
|      | FKBP5 methylation                         | 4.552   | 1 | 0.03  | 0.10  |
|      | Diagnosis * rs1360780                     | 0.127   | 1 | 0.72  | 0.84  |
|      | Diagnosis * FKBP5 methylation             | 4.739   | 1 | 0.03  | 0.10  |
|      | rs1360780 * FKBP5 methylation             | 0.747   | 1 | 0.39  | 0.71  |
|      | Diagnosis * rs1360780 * FKBP5 methylation | 0.243   | 1 | 0.62  | 0.77  |
| MFG  | Diagnosis                                 | 0.346   | 1 | 0.56  | 0.75  |
|      | Site                                      | 20.079  | 1 | <0.01 | <0.01 |
|      | Sex                                       | 0.954   | 1 | 0.33  | 0.64  |
|      | rs1360780                                 | 0.728   | 1 | 0.39  | 0.71  |
|      | Age                                       | 123.755 | 1 | <0.01 | <0.01 |
|      | TIV                                       | 188.449 | 1 | <0.01 | <0.01 |
|      | Side                                      | 3.576   | 1 | 0.06  | 0.17  |
|      | FKBP5 methylation                         | 0.007   | 1 | 0.94  | 0.98  |
|      | Diagnosis * rs1360780                     | 1.04    | 1 | 0.31  | 0.63  |
|      | Diagnosis * FKBP5 methylation             | 0.303   | 1 | 0.58  | 0.76  |
|      | rs1360780 * FKBP5 methylation             | 0.817   | 1 | 0.37  | 0.70  |
|      | Diagnosis * rs1360780 * FKBP5 methylation | 1.102   | 1 | 0.29  | 0.61  |
| MFOG | Diagnosis                                 | 0.008   | 1 | 0.93  | 0.98  |
|      | Site                                      | 27.944  | 1 | <0.01 | <0.01 |
|      | Sex                                       | 0.496   | 1 | 0.48  | 0.71  |
|      | rs1360780                                 | 0.6     | 1 | 0.44  | 0.71  |
|      | Age                                       | 64.339  | 1 | <0.01 | <0.01 |
|      | TIV                                       | 114.973 | 1 | <0.01 | <0.01 |
|      | Side                                      | 22.758  | 1 | <0.01 | <0.01 |
|      | FKBP5 methylation                         | 2.282   | 1 | 0.13  | 0.33  |
|      | Diagnosis * rs1360780                     | 0.981   | 1 | 0.32  | 0.63  |
|      | Diagnosis * FKBP5 methylation             | 0.028   | 1 | 0.87  | 0.94  |
|      | rs1360780 * FKBP5 methylation             | 0.614   | 1 | 0.43  | 0.71  |
|      | Diagnosis * rs1360780 * FKBP5 methylation | 1.087   | 1 | 0.30  | 0.62  |
| SFG  | Diagnosis                                 | 0.516   | 1 | 0.47  | 0.71  |
|      | Site                                      | 24.203  | 1 | <0.01 | <0.01 |
|      | Sex                                       | 1.002   | 1 | 0.32  | 0.63  |
|      | rs1360780                                 | 0       | 1 | 1.00  | 1.00  |
|      | Age                                       | 57.469  | 1 | <0.01 | <0.01 |
|      | TIV                                       | 111.912 | 1 | <0.01 | <0.01 |
|      | Side                                      | 3.396   | 1 | 0.07  | 0.20  |
|      | FKBP5 methylation                         | 0.217   | 1 | 0.64  | 0.77  |
|      | Diagnosis * rs1360780                     | 0.25    | 1 | 0.62  | 0.77  |
|      | Diagnosis * FKBP5 methylation             | 0.47    | 1 | 0.49  | 0.72  |
|      | rs1360780 * FKBP5 methylation             | 0.001   | 1 | 0.97  | 0.98  |
|      | Diagnosis * rs1360780 * FKBP5 methylation | 0.277   | 1 | 0.60  | 0.76  |
| SFO  | Diagnosis                                 | 0.365   | 1 | 0.55  | 0.74  |
|      | Site                                      | 3.844   | 1 | 0.05  | 0.15  |
|      | Sex                                       | 0.385   | 1 | 0.54  | 0.74  |
|      | rs1360780                                 | 0.086   | 1 | 0.77  | 0.88  |
|      | Age                                       | 60.877  | 1 | <0.01 | <0.01 |
|      | TIV                                       | 200.98  | 1 | <0.01 | <0.01 |
|      | Side                                      | 4.222   | 1 | 0.04  | 0.12  |
|      | FKBP5 methylation                         | 3.028   | 1 | 0.08  | 0.22  |
|      | Diagnosis * rs1360780                     | 1.929   | 1 | 0.17  | 0.41  |
|      | Diagnosis * FKBP5 methylation             | 0.33    | 1 | 0.57  | 0.75  |
|      | rs1360780 * FKBP5 methylation             | 0.088   | 1 | 0.77  | 0.88  |
|      | Diagnosis * rs1360780 * FKBP5 methylation | 1.727   | 1 | 0.19  | 0.45  |
| SMF  | Diagnosis                                 | 0.375   | 1 | 0.54  | 0.74  |
|      | Site                                      | 14.294  | 1 | <0.01 | <0.01 |
|      | Sex                                       | 1.095   | 1 | 0.30  | 0.62  |
|      | rs1360780                                 | 0.39    | 1 | 0.53  | 0.74  |
|      | Age                                       | 143.061 | 1 | <0.01 | <0.01 |
|      | TIV                                       | 129.118 | 1 | <0.01 | <0.01 |
|      | Side                                      | 36.215  | 1 | <0.01 | <0.01 |
|      | FKBP5 methylation                         | 0.416   | 1 | 0.52  | 0.74  |
|      | Diagnosis * rs1360780                     | 0.05    | 1 | 0.82  | 0.91  |
|      | Diagnosis * FKBP5 methylation             | 0.433   | 1 | 0.51  | 0.74  |
|      | rs1360780 * FKBP5 methylation             | 0.423   | 1 | 0.52  | 0.74  |
|      | Diagnosis * rs1360780 * FKBP5 methylation | 0.059   | 1 | 0.81  | 0.91  |
